# Supplementary material for: The Prokaryotic Microbiome of Acropora digitifera is Stable under Short-Term Artificial Light Pollution
Source: PubMed Central journal article supplement (PMC7601249; doi:10.3390/microorganisms8101566), 2020-10-12
Supplement: microorganisms-08-01566-s001.pdf [file microorganisms-08-01566-s001.pdf]

## Supplementary Materials

### **The Prokaryotic Microbiome of *Acropora digitifera* is Stable Under Short-Term Artificial Light Pollution**

Jake Ivan P. Baquiran <sup>1</sup>, Michael Angelou L. Nada <sup>1</sup>, Celine Luisa D. Campos <sup>1</sup>, Sherry Lyn G.

Sayco <sup>1</sup>, Patrick C. Cabaitan <sup>1</sup>, Yaeli Rosenberg<sup>2</sup>, Inbal Ayalon<sup>2,3,4</sup>, Oren Levy <sup>2</sup> and Cecilia Conaco<sup>1,\*</sup>

<sup>1</sup> Marine Science Institute, University of the Philippines Diliman, Quezon City, 1101, Philippines; jpbaquiran@up.edu.ph (J.I.P.B.); mlnada@up.edu.ph (M.A.L.N.); campos.celine18@gmail.com (C.L.D.C.); slsayco@msi.upd.edu.ph (S.L.G.S.); pcabaitan@msi.upd.edu.ph (P.C.C.)

<sup>2</sup> Mina and Everard Goodman Faculty of Life Sciences, Bar-Ilan University, Ramat Gan, 5290002, Israel; yaelirose@gmail.com (Y.R.); inbalaya@gmail.com (I.A); oren.levy@biu.ac.il (O.L.)

<sup>3</sup> Israel The H. Steinitz Marine Biology Laboratory, The Interuniversity Institute for Marine Sciences of Eilat, P.O. Box 469, Eilat 88103, Israel

<sup>4</sup> Porter School of the Environment and Earth Sciences, Faculty of Exact Sciences, Tel Aviv University, 39040, Israel

\*Correspondence: [cconaco@msi.upd.edu.ph](mailto:cconaco@msi.upd.edu.ph)

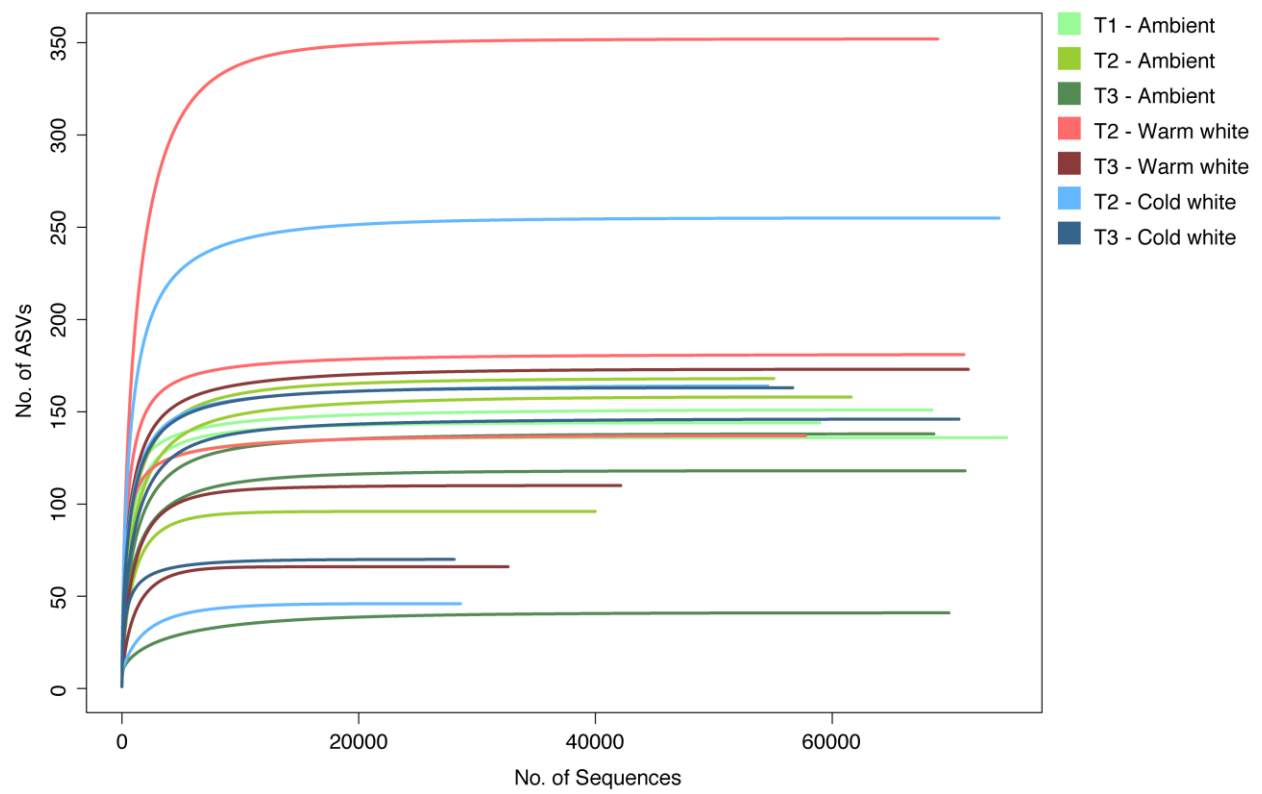

**Figure S1.** Rarefaction curves for all samples based on number of ASVs identified by sequencing of the 16S rRNA V4 region.

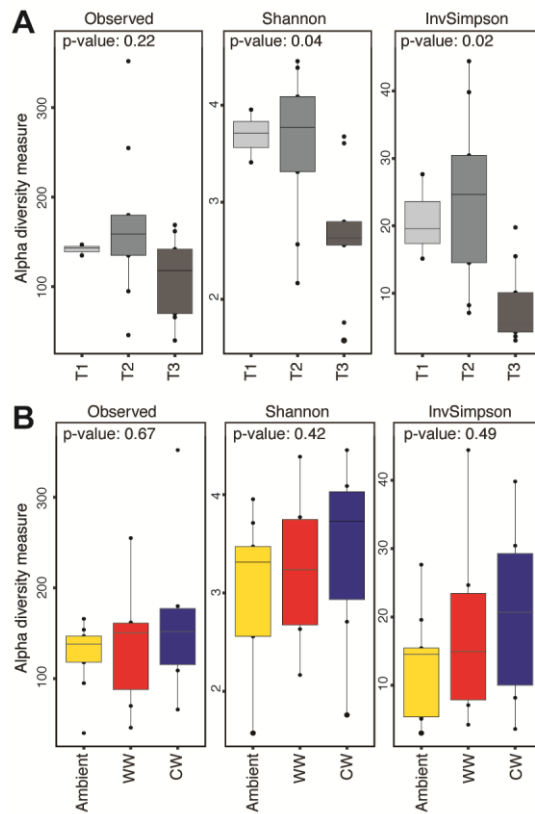

**Figure S2.** Alpha diversity of the *Acropora digitifera* microbiome. Observed ASVs, Shannon, and Inverse Simpson indices across (A) timepoints (T1, January; T2, February; T3, March) or (B) treatments (ambient moonlight; WW light, warm white; CW, cold white light). Kruskal-Wallis test p-values for comparisons between treatments and timepoints are shown. p-values < 0.05 indicate significant difference of the global statistics.

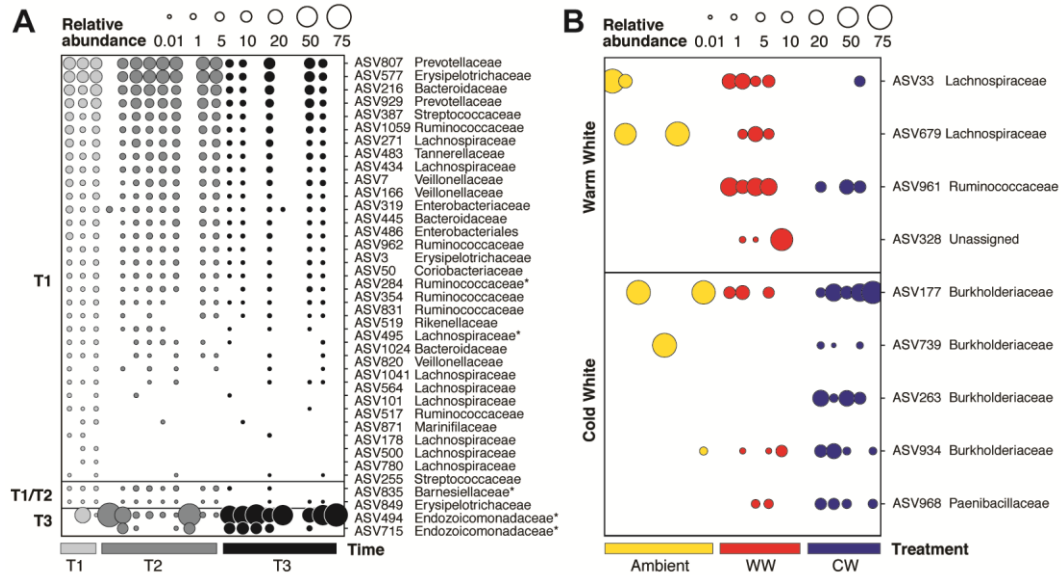

**Figure S3.** Bacterial indicator taxa for timepoints and light treatments. The relative abundance of ASVs significantly associated with specific (A) timepoints (T1, January; T2, February; T3, March) or (B) treatments (ambient moonlight, ambient; warm white, WW; cold white, CW), as indicated on the left side of the graphs, are shown. Bacterial indicator taxa were identified using the indicpecies algorithm (p-value <0.05). ASVs with asterisks were also identified as differentially abundant using ALDEx2 (Figure 3).

**Table S1.** Environmental conditions in experimental tanks from January to March 2019.

| <b>Parameter</b>            | <b>Treatment tanks</b> | <b>Average (<math>\pm</math>SD)</b> |
|-----------------------------|------------------------|-------------------------------------|
| Temperature ( $^{\circ}$ C) | Ambient (T1)           | 26.80 $\pm$ 0.16                    |
|                             | Ambient (T2)           | 27.34 $\pm$ 0.28                    |
|                             | Ambient (T3)           | 28.79 $\pm$ 0.44                    |
|                             | Cold white (T1)        | 26.52 $\pm$ 0.45                    |
|                             | Cold white (T2)        | 27.19 $\pm$ 0.35                    |
|                             | Cold white (T3)        | 28.57 $\pm$ 0.25                    |
|                             | Warm white (T1)        | 27.03 $\pm$ 0.17                    |
|                             | Warm white (T2)        | 27.21 $\pm$ 0.33                    |
|                             | Warm white (T3)        | 28.65 $\pm$ 0.25                    |
| Salinity                    | Ambient                | 31.33 $\pm$ 0.74                    |
|                             | Cold white             | 31.48 $\pm$ 0.71                    |
|                             | Warm white             | 31.42 $\pm$ 0.73                    |
| pH                          | Ambient                | 7.90 $\pm$ 0.14                     |
|                             | Cold white             | 7.92 $\pm$ 0.13                     |
|                             | Warm white             | 7.89 $\pm$ 0.13                     |
| DO (mg/L)                   | Ambient                | 4.70 $\pm$ 2.25                     |
|                             | Cold white             | 4.57 $\pm$ 2.04                     |
|                             | Warm white             | 4.42 $\pm$ 2.09                     |

**Table S2.** Information on *Acropora digitifera* colonies used in the study.

| Sample name           | Colony ID | Time                                                           | Treatment  |
|-----------------------|-----------|----------------------------------------------------------------|------------|
| Ambient January_1     | DA42      | T1-January<br>(25 January 2019; after 3 weeks acclimatization) | Ambient    |
| Ambient January_2     | DA43      |                                                                |            |
| Ambient January_3     | DB3       |                                                                |            |
| Cold white February_1 | DB3       | T2-February<br>(25 February 2019; 1 month exposure)            | Cold white |
| Cold white February_2 | DB4       |                                                                |            |
| Cold white February_3 | DB5       |                                                                |            |
| Warm white February_1 | DR22      |                                                                | Warm white |
| Warm white February_2 | DR23      |                                                                |            |
| Warm white February_3 | DR24      |                                                                |            |
| Ambient February_1    | DA41      | T3-March<br>(30 March 2019; 2 months exposure; spawning night) | Ambient    |
| Ambient February_2    | DA43      |                                                                |            |
| Ambient February_3    | DA44      |                                                                |            |
| Cold white March_1    | DB2       | T3-March<br>(30 March 2019; 2 months exposure; spawning night) | Cold white |
| Cold white March_2    | DB3       |                                                                |            |
| Cold white March_3    | DB4       |                                                                |            |
| Warm white March_1    | DR22      |                                                                | Warm white |
| Warm white March_2    | DR23      |                                                                |            |
| Warm white March_3    | DR24      |                                                                |            |
| Ambient March_1       | DA41      | T3-March<br>(30 March 2019; 2 months exposure; spawning night) | Ambient    |
| Ambient March_2       | DA42      |                                                                |            |
| Ambient March_3       | DA43      |                                                                |            |
